# Supplementary material
Source: Research Square preprint supplement (doi:10.21203/rs.3.rs-9204313/v1)
Supplement: Supplementary file 1 [file e6f69073406794081402e064.pdf]

# Supplementary materials:

## **Not so dangerous? PET environmental-like microplastics and nanoplastics (PET-eIMNPs) effect on *Escherichia coli* and environmental bacteria**

Ondrej Pencik<sup>1,\*</sup>, Martin Cerny<sup>2</sup>, Jana Tomekova<sup>3</sup>, Milada Vodova<sup>3</sup>, Hoang-Anh Cao<sup>4</sup>, Jiri Kucerik<sup>5</sup>, Vendula Hrabalová<sup>6</sup>, Katarína Molnárová<sup>3</sup>, Jakub Tremel<sup>1</sup>, Martina Kolackova<sup>3</sup>, Jaromir Bacovsky<sup>6</sup>

<sup>1</sup>Department of Molecular Pharmacy, Faculty of Pharmacy, Masaryk University, Palackého třída 1946/1, 61200, Brno, Czech Republic

<sup>2</sup>Department of Molecular Biology and Radiobiology, Faculty of AgriSciences, Mendel University in Brno, Zemědělská 1/1665, 613 00 Brno, Czech Republic<sup>3</sup>Department of Chemistry and Biochemistry, Mendel University in Brno, Zemědělská 1665/1, 613 00, Brno, Czech Republic.

<sup>4</sup>Brno University of Technology, Central European Institute of Technology, Brno, Czech Republic

<sup>5</sup>Department of Agrochemistry, Soil Science, Microbiology and Plant Nutrition, Mendel University in Brno, Zemědělská 1665/1, 613 00, Brno, Czech Republic.

<sup>6</sup>Delong Instruments a.s., Palackého třída 3019/153b, 612 00, Brno, Czech Republic

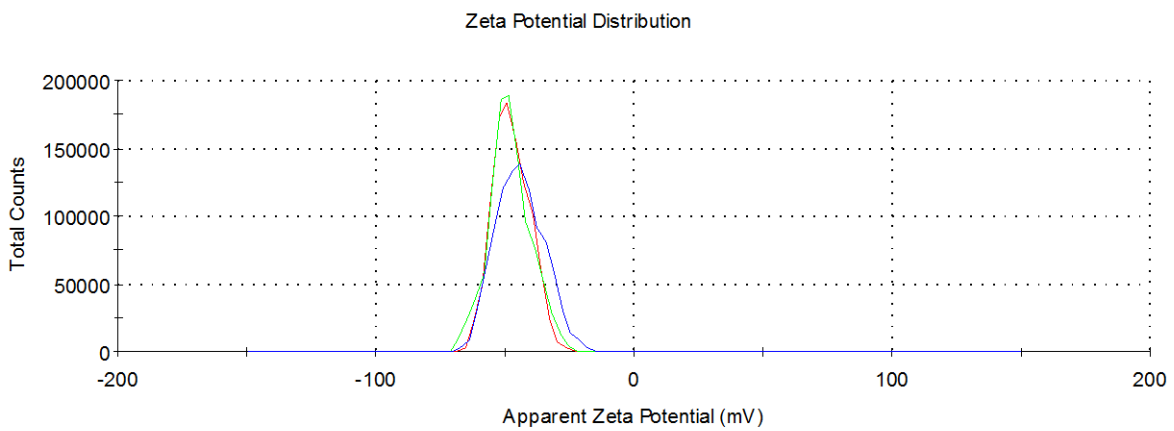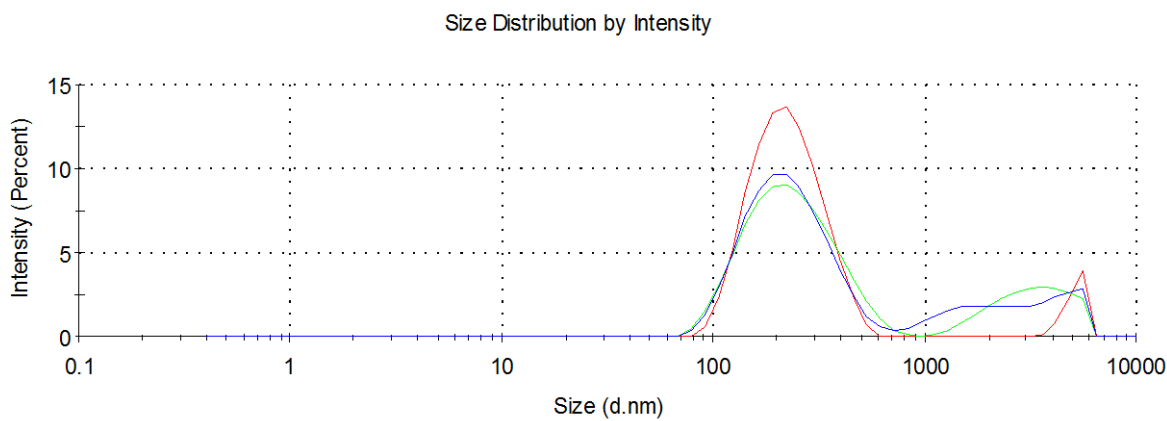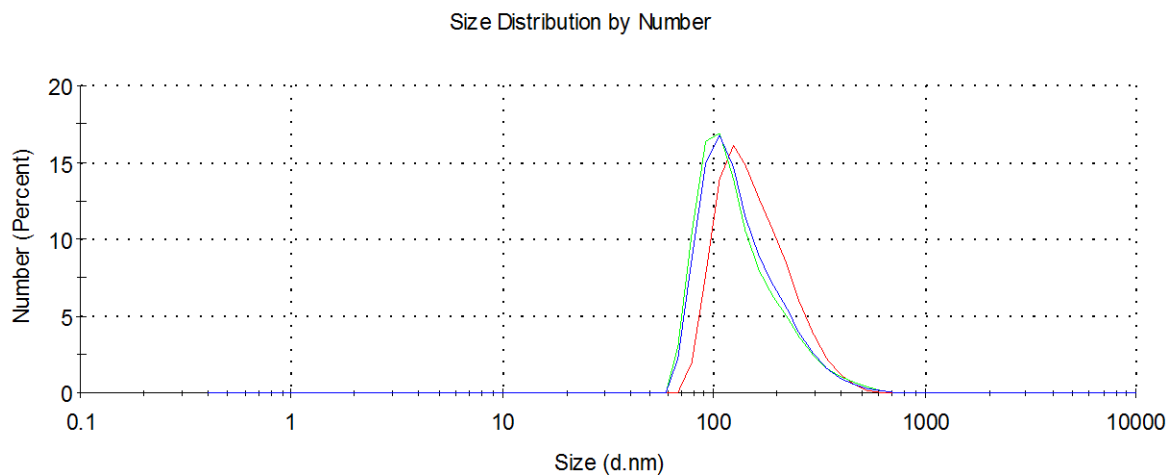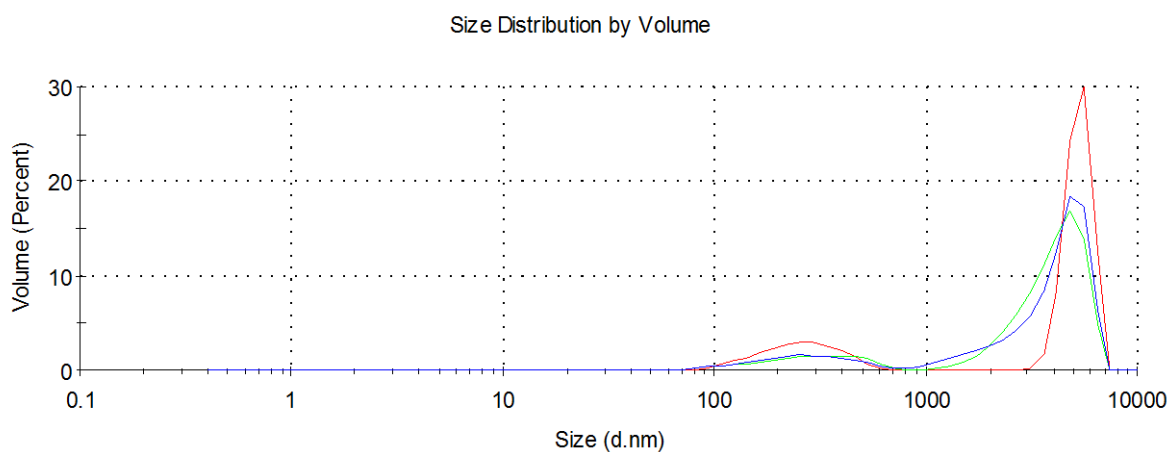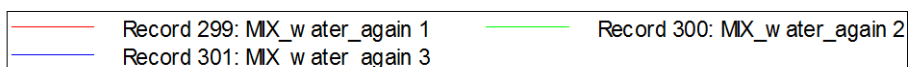

**S1:** Zeta-potential and DLS results (Intensity, Number, Volume size distribution). Settings: refractive index 1.575, adsorption coefficient 0.160, temperature 25 °C, equilibration time 120 s, measurement angle of 173° backscatter

C)

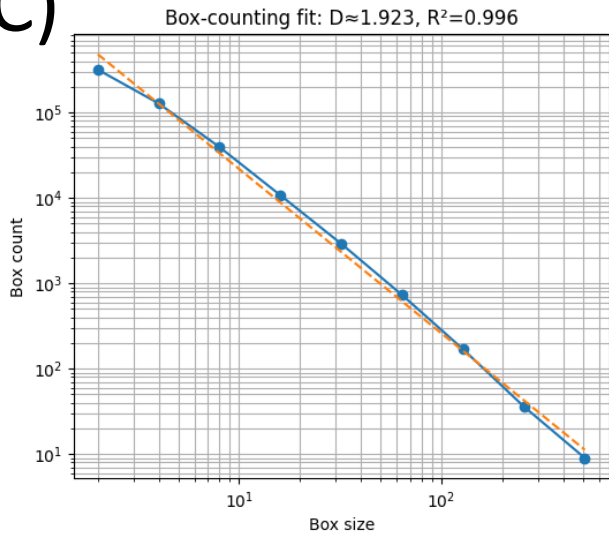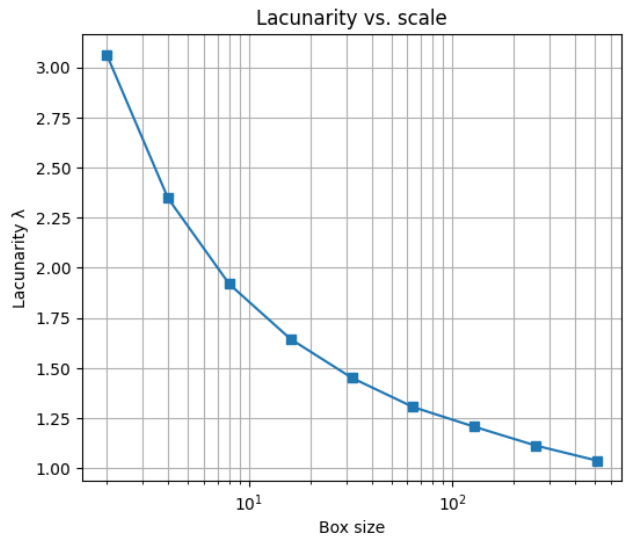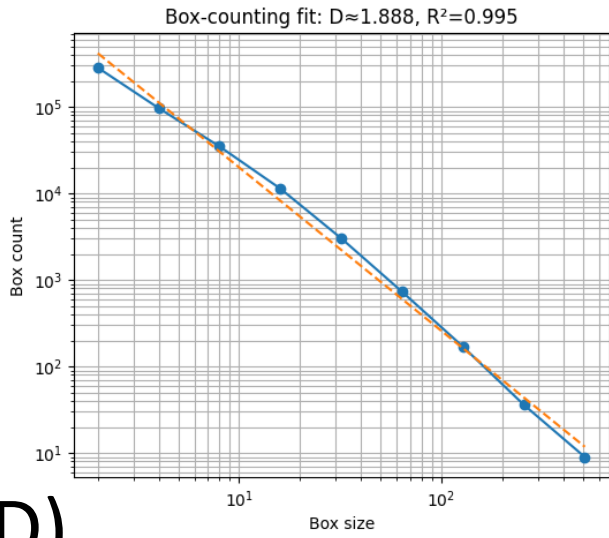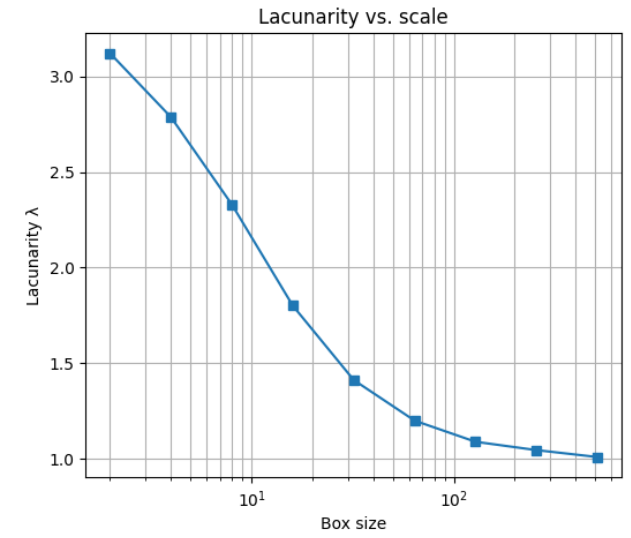

D)

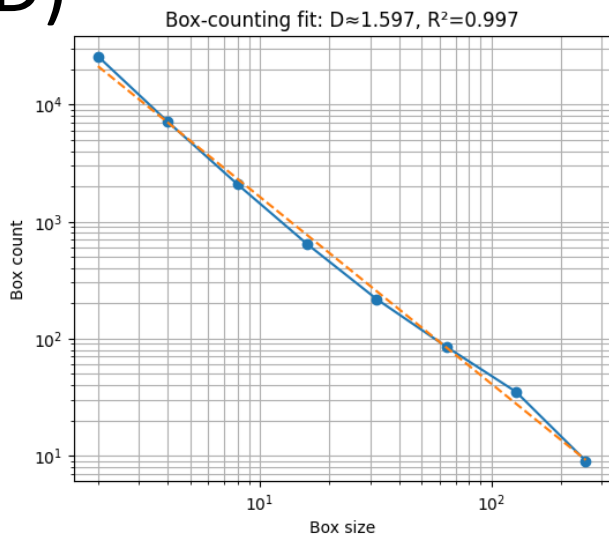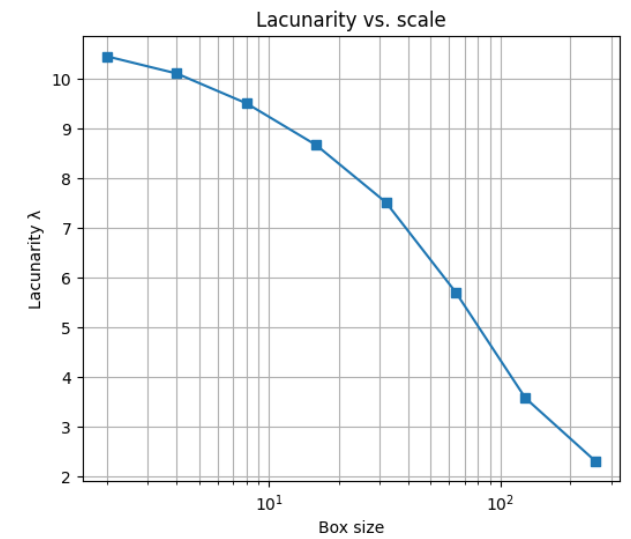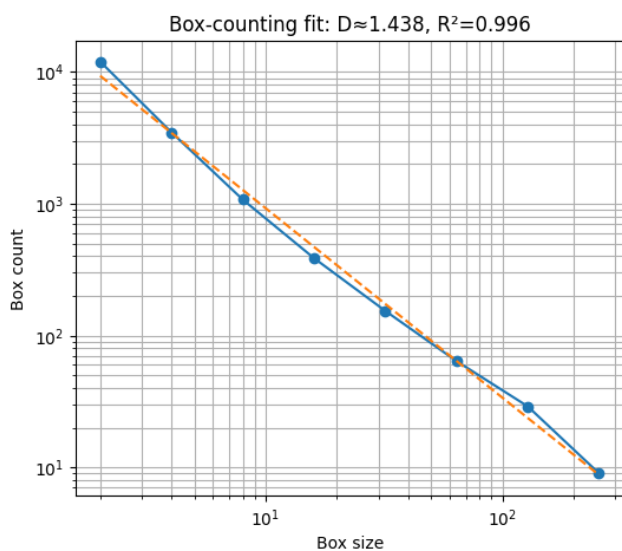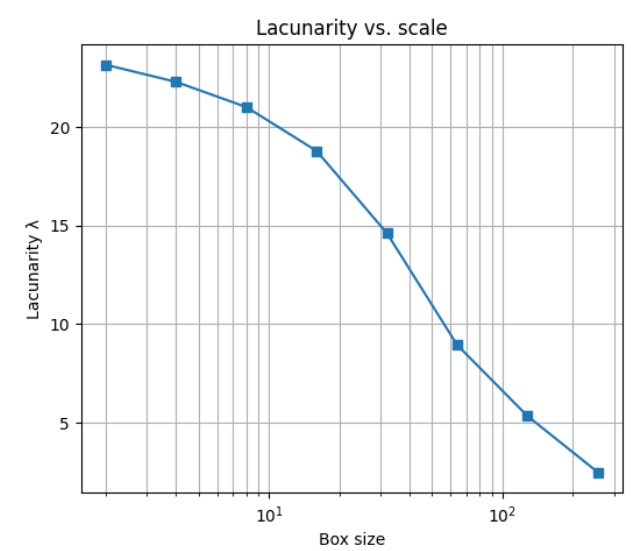

**S2:** C) SEM images fractal dimension and lacunarity, D) TEM images fractal dimension and lacunarity calculations

*Escherichia coli*

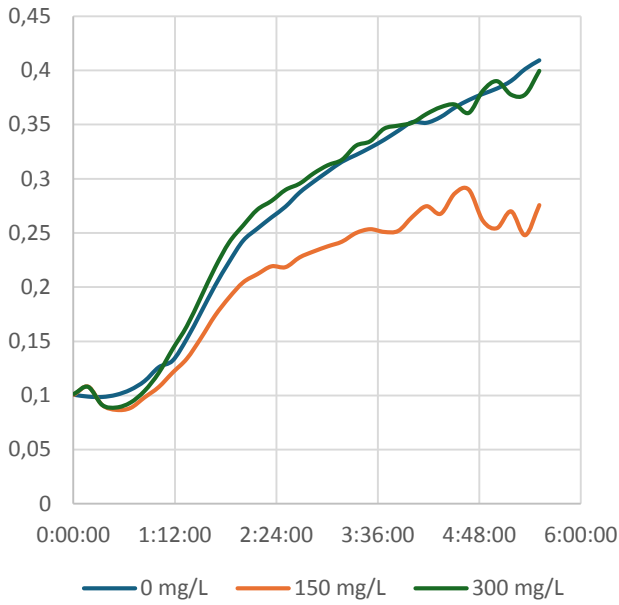

*Pseudoaltermonas rubra*

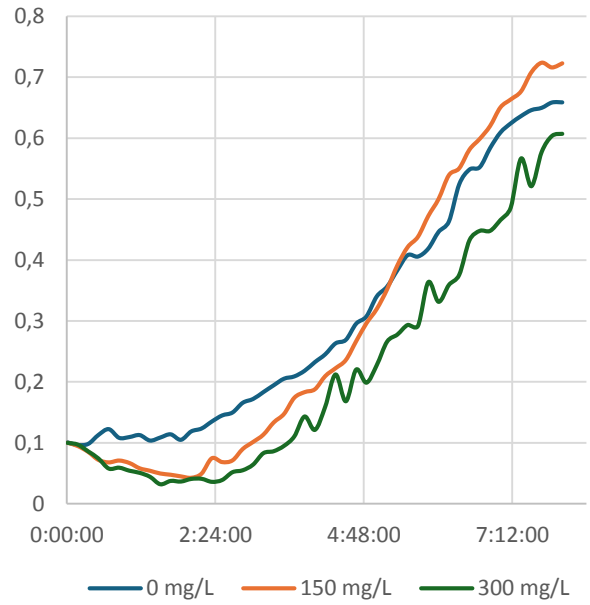

*Vibrio natriegens*

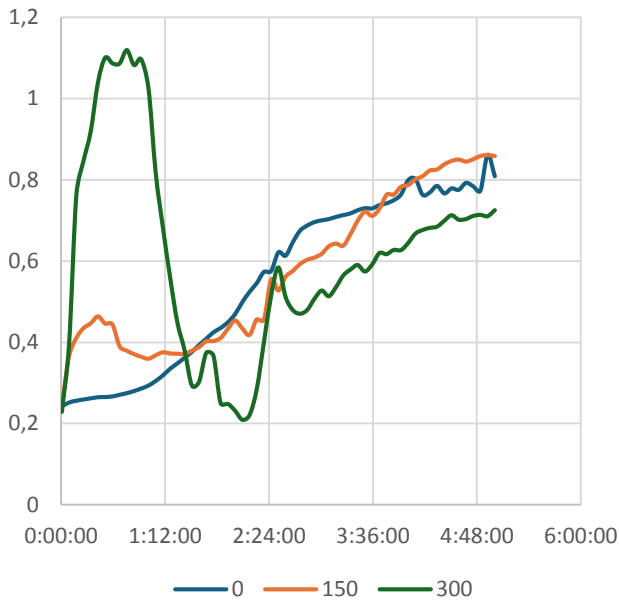

*Vibrio natriegens - repeat*

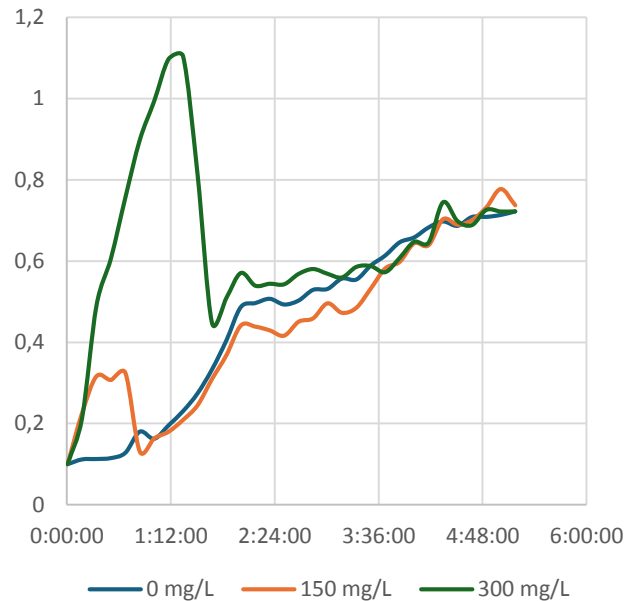

*Curtobacterium oceanosedimentum*

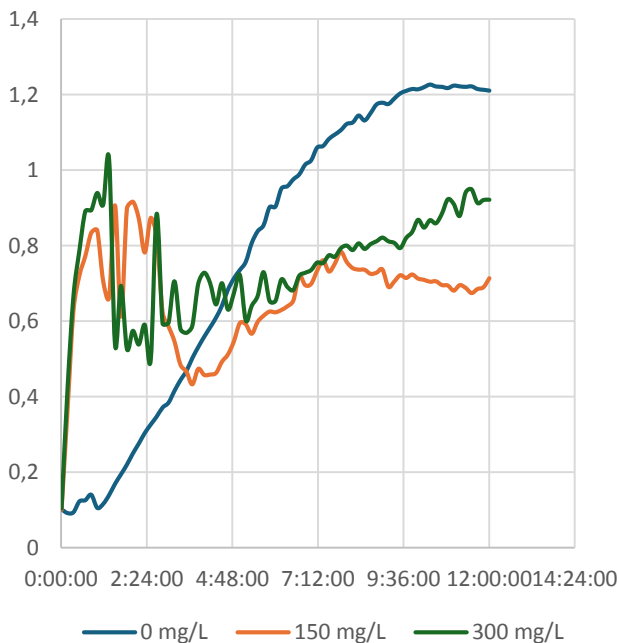

*Bacillus mycoides*

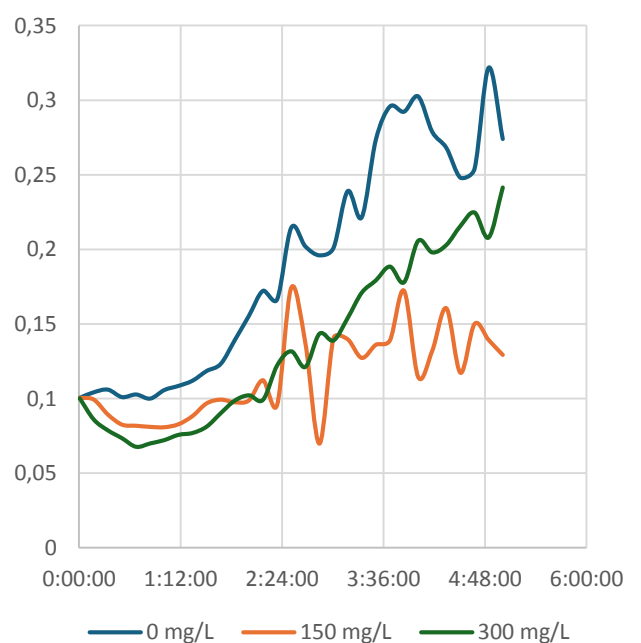

**S3:** Growth patterns from proteome/confocal samples. Settings are following: 30 °C (*E. coli* 37 °C), shaking duration 30 s, shaking amplitude 4 mm, wavelength 600 nm, interval 10 minutes, number of replicates: 4

**A) (-) Hoechst + CellROX: control**

**B) (-) PI + FDA: control**

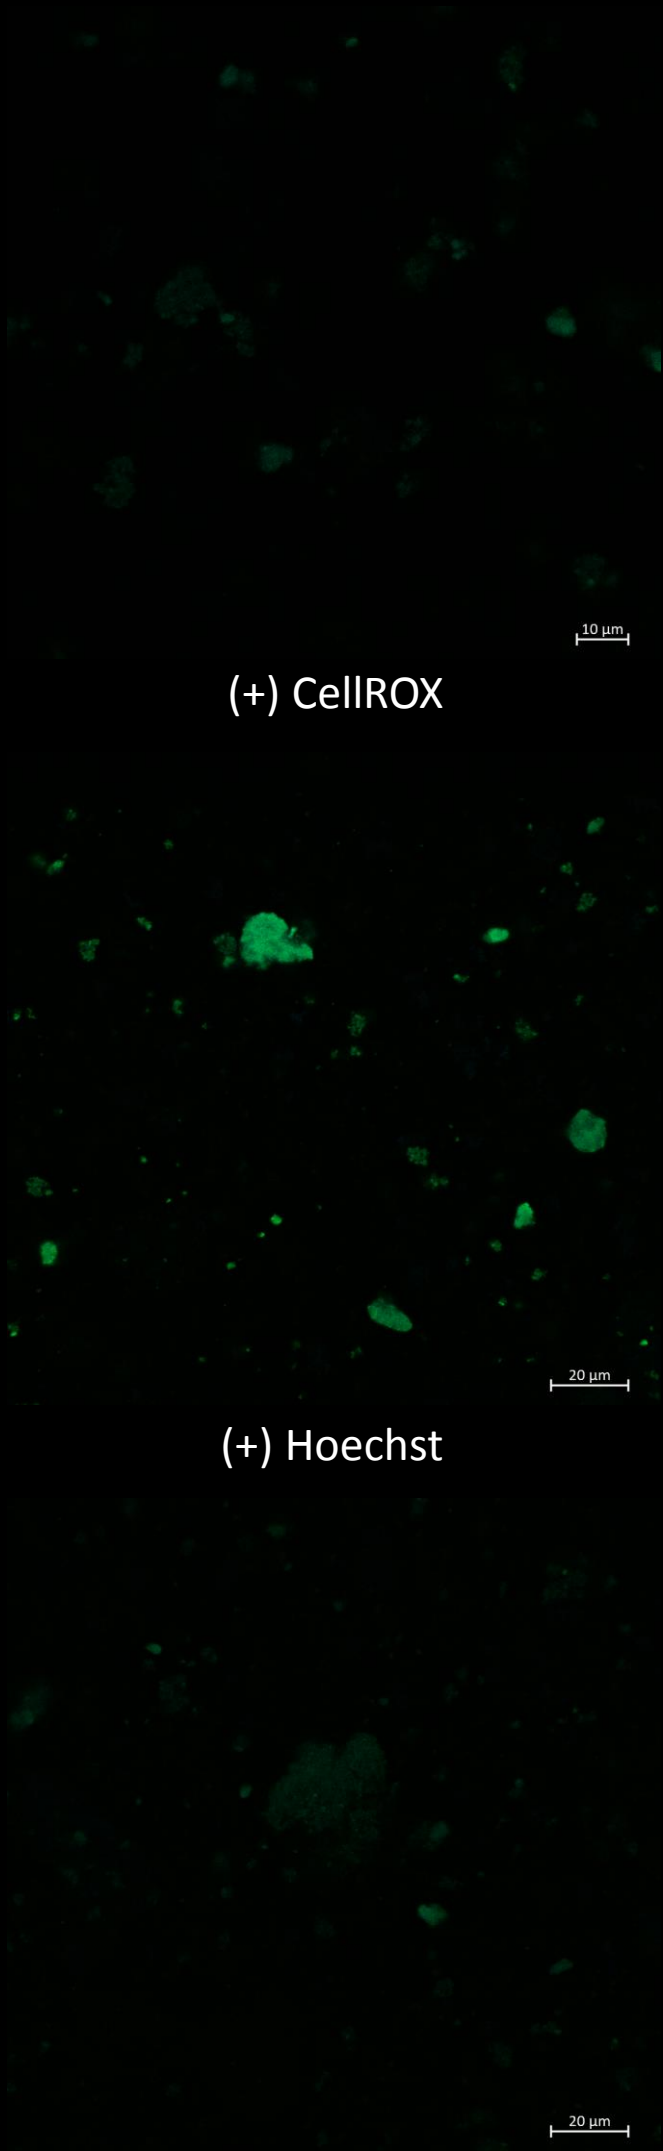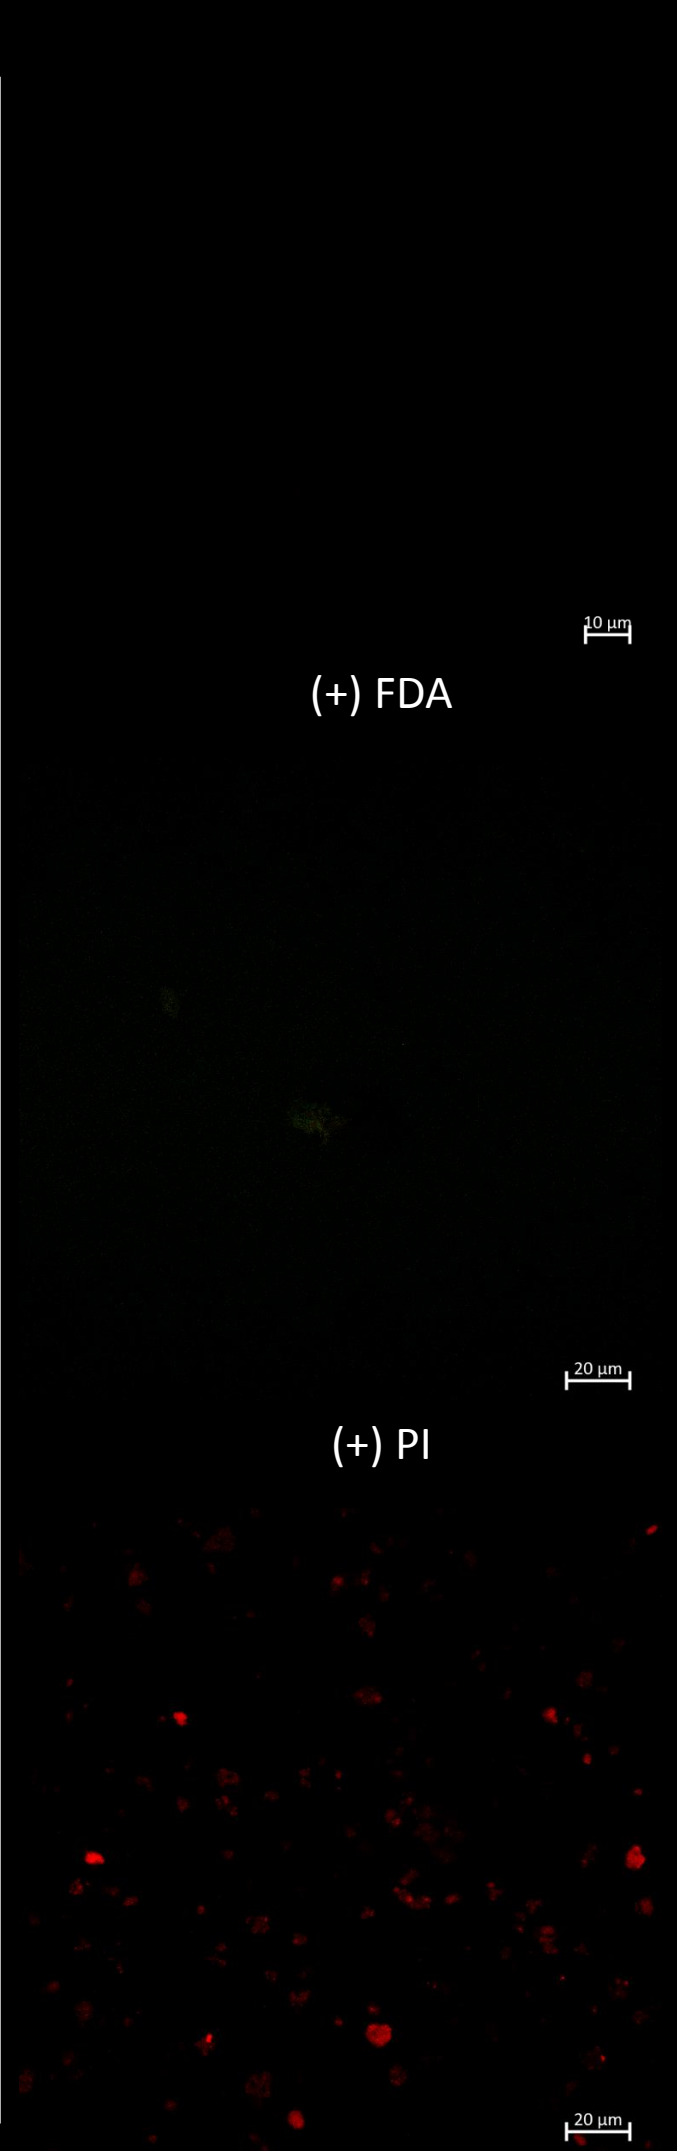

*S4: Negative control for MNPs measurements: A) (up-down line) H + ROX: control (no staining), CellROX staining, Hoechst staining, B) (up-down line) FDA + PI: control (no staining), FDA staining, PI staining*

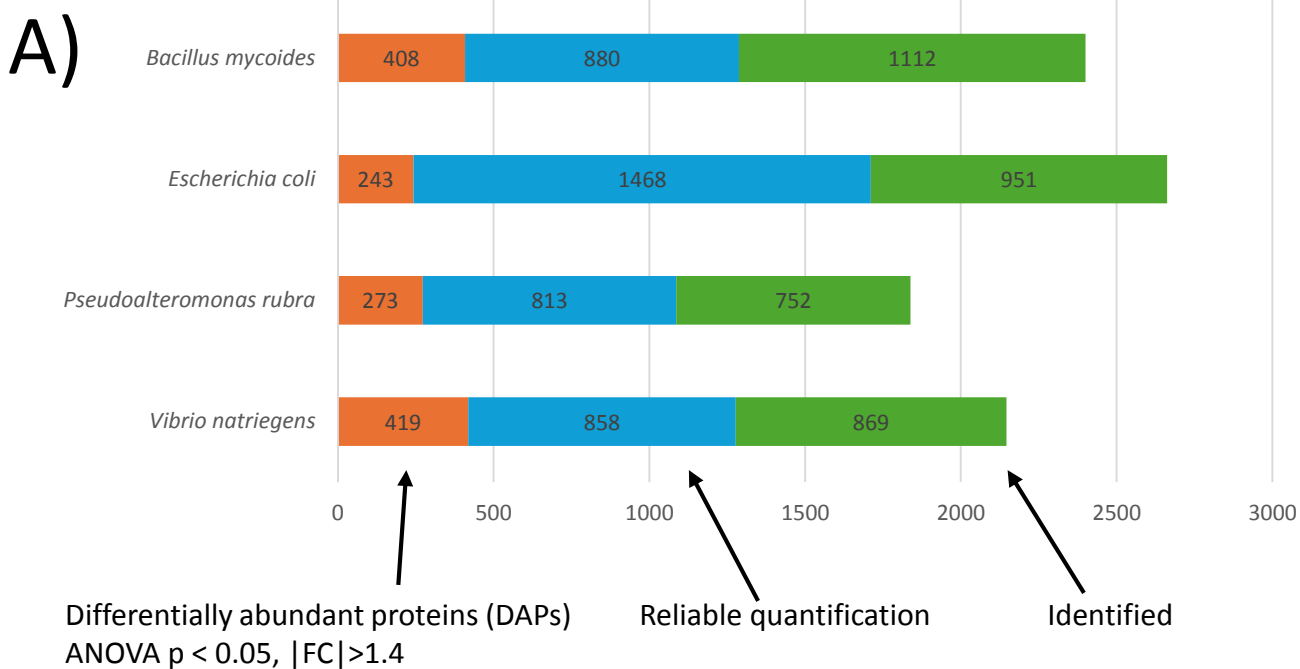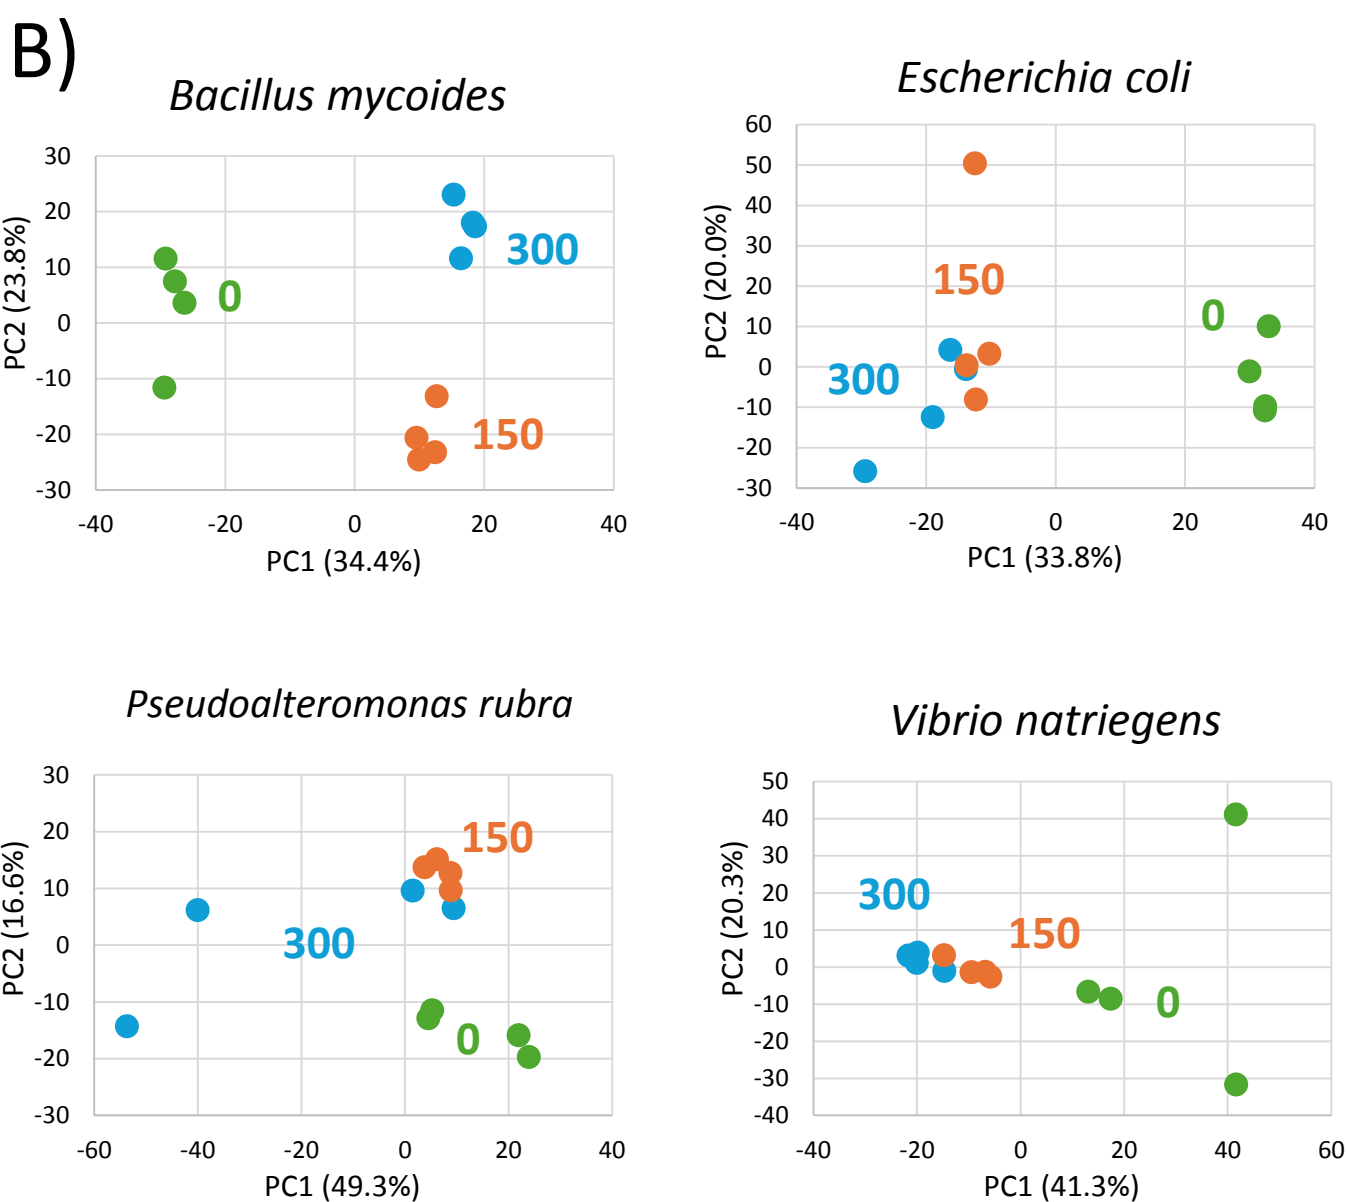

**S5: Proteomic parameters:** A) Protein count overview – DAPs, reliable quantified proteins, identified but non-quantified proteins. B) Principal component analysis (PCA) of bacteria.

# Escherichia coli

## A) DOWN

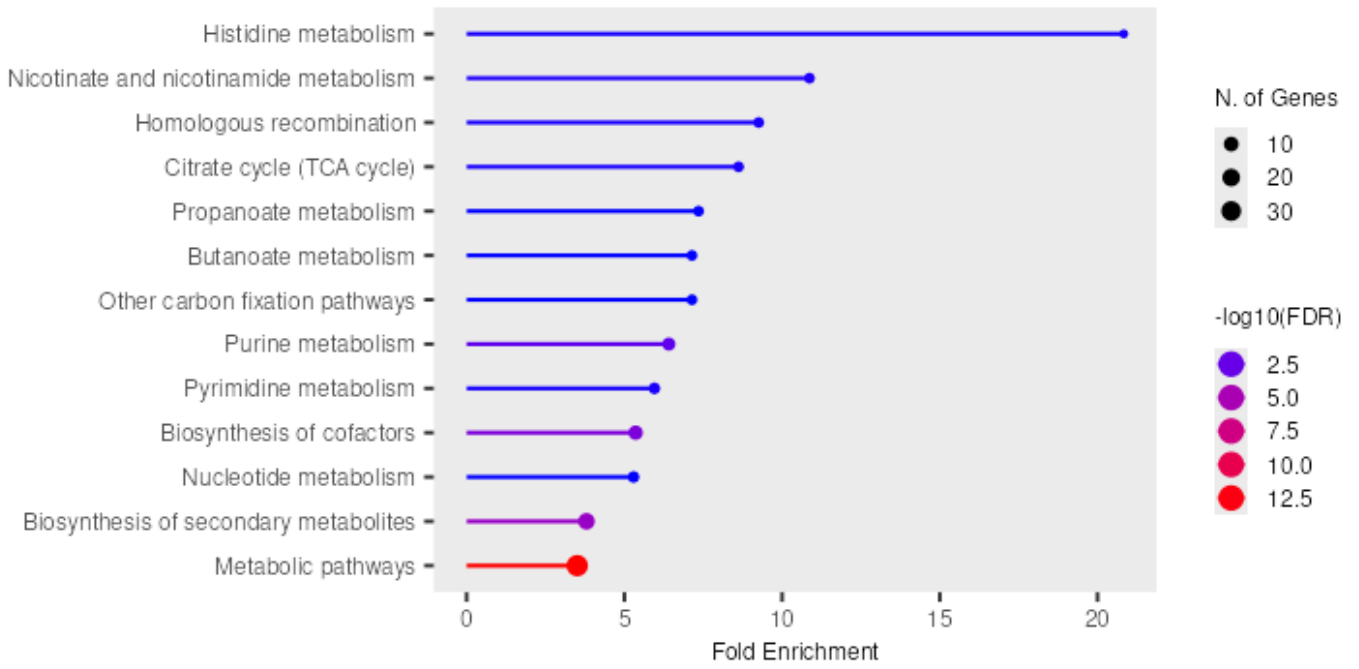

## B) UP

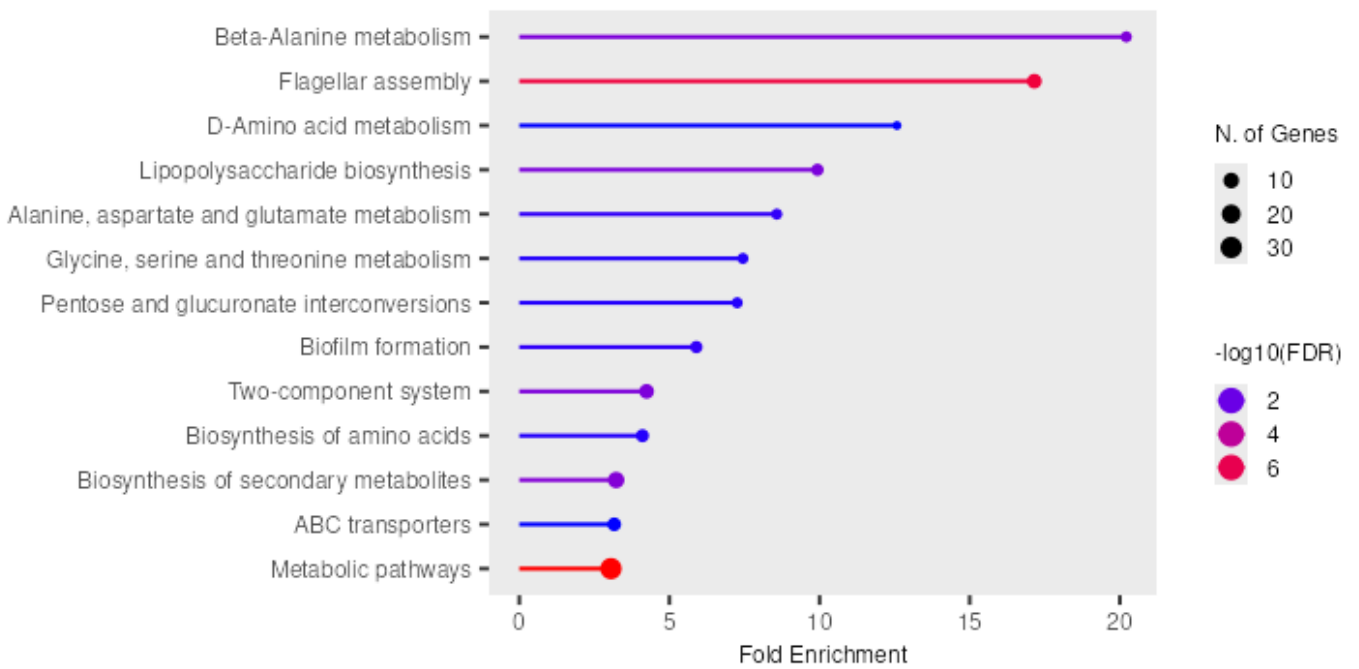

**S6:** ShinyGO gene ontology and enrichment for Escherichia coli K12: a) statistically significant different decreased protein abundance data set (DOWN) derived pathways, b) statistically significant different increased protein abundance data set (UP) derived pathways

# Vibrio natriegens

## A) DOWN

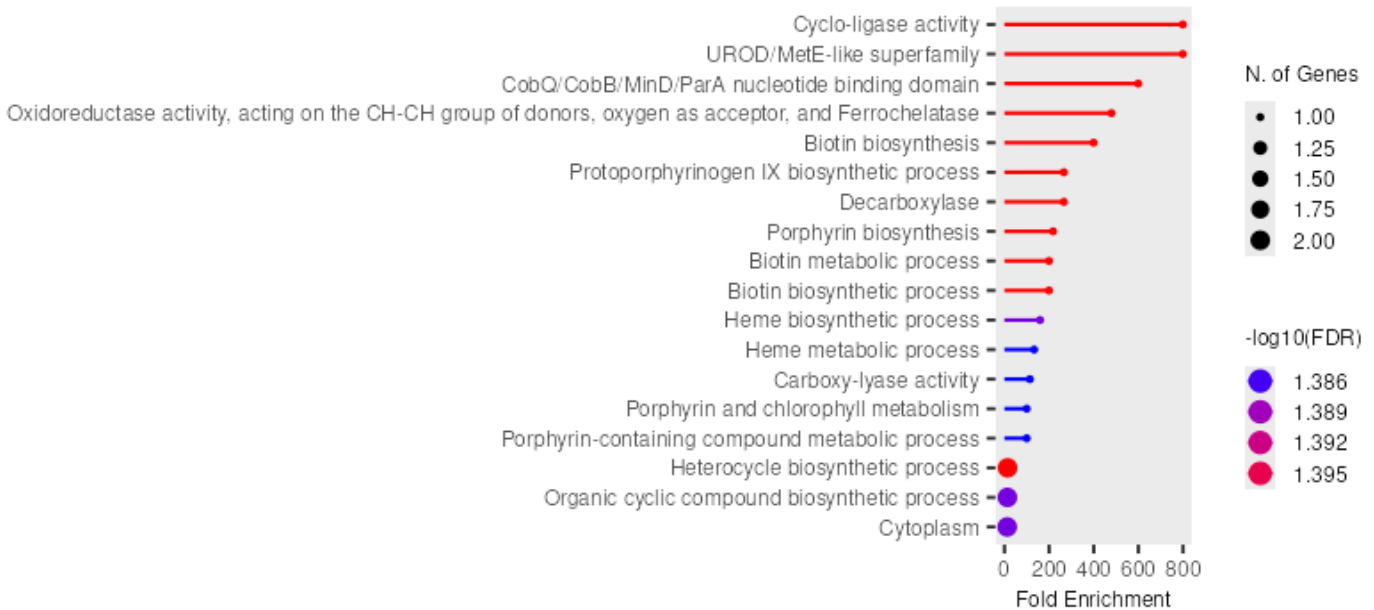

## B) UP

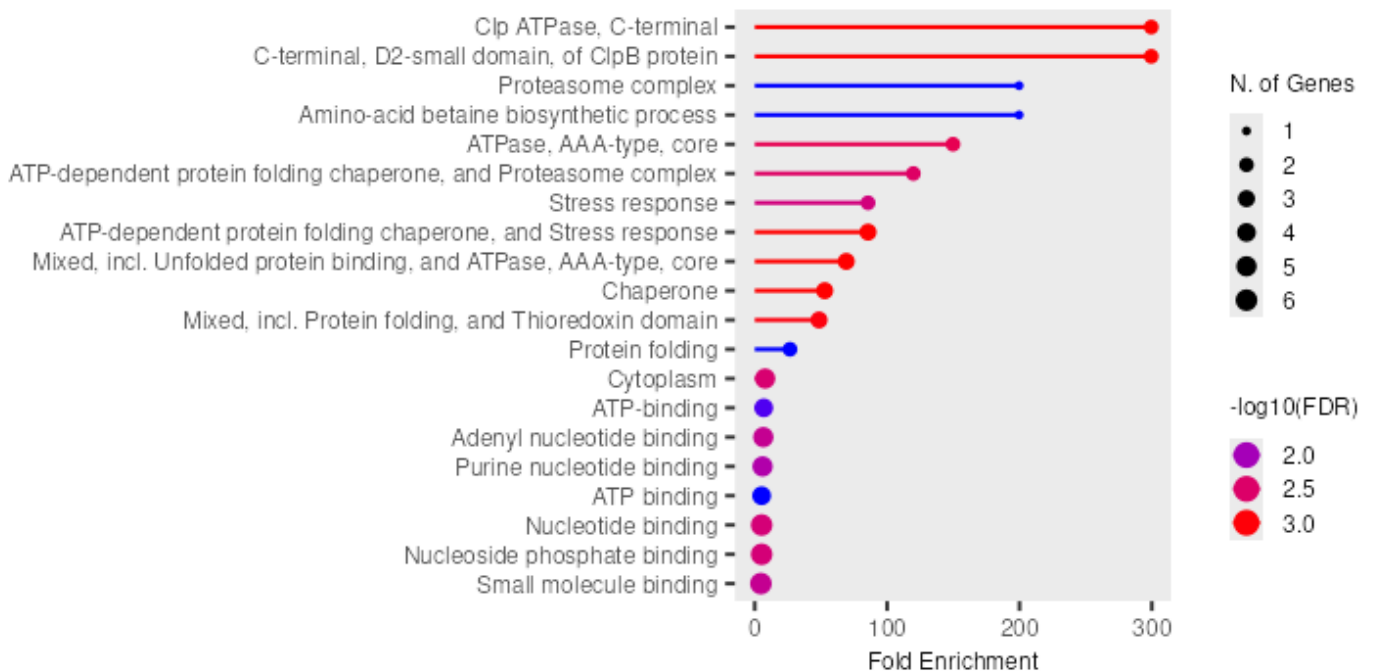

**S7:** ShinyGO gene ontology and enrichment for *Vibrio natriegens*: a) statistically significant different decreased protein abundance data set (DOWN) derived pathways, b) statistically significant different increased protein abundance data set (UP) derived pathways

# *Pseudoalteromonas rubra*

## A) DOWN

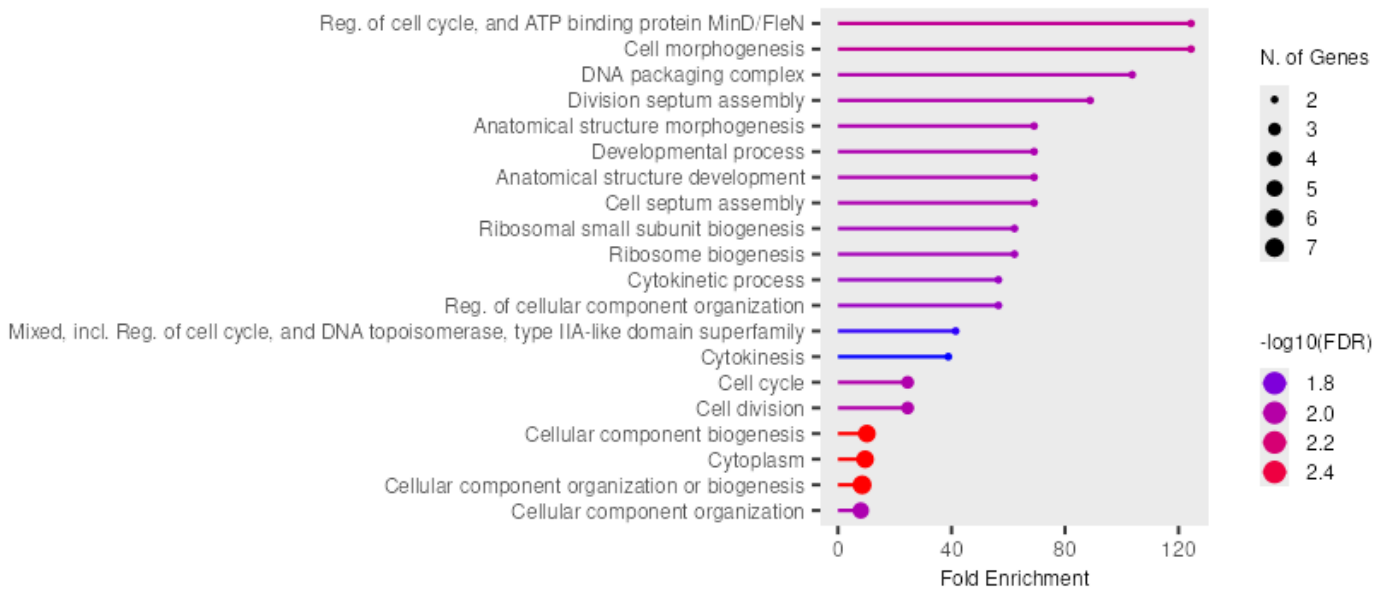

## B) UP

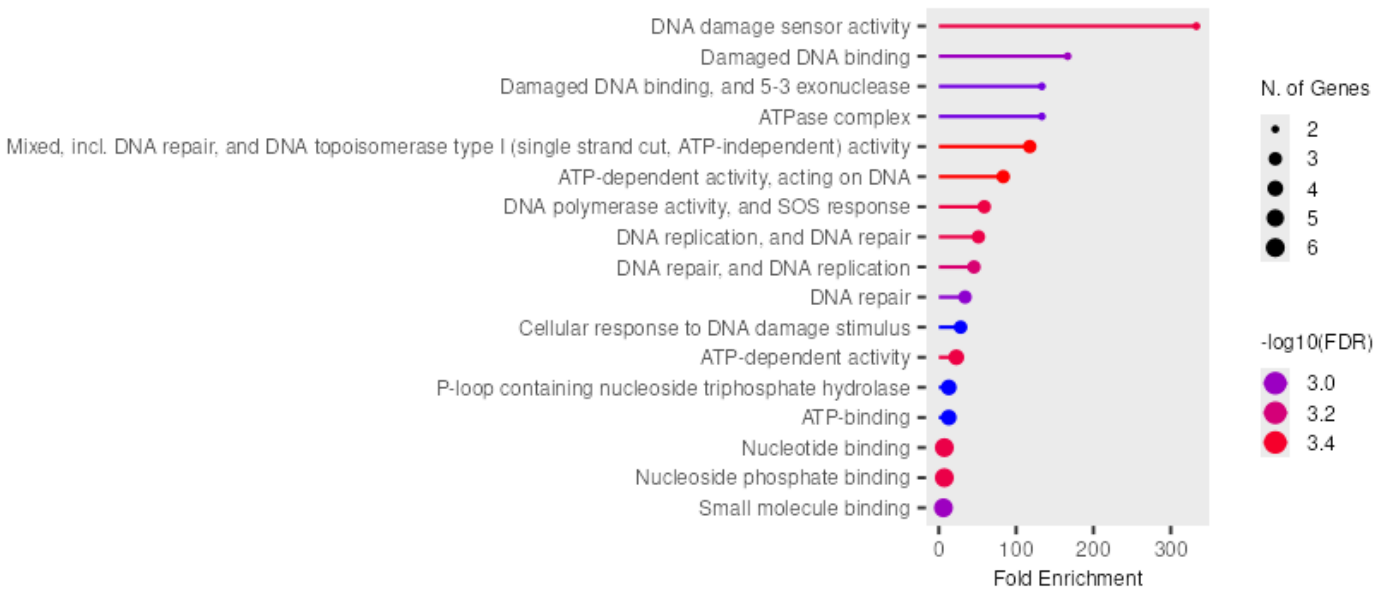

**S8:** ShinyGO gene ontology and enrichment for *Pseudoalteromonas rubra*: a) statistically significant different decreased protein abundance data set (DOWN) derived pathways, b) statistically significant different increased protein abundance data set (UP) derived pathways

# Bacillus mycooides

## A) DOWN

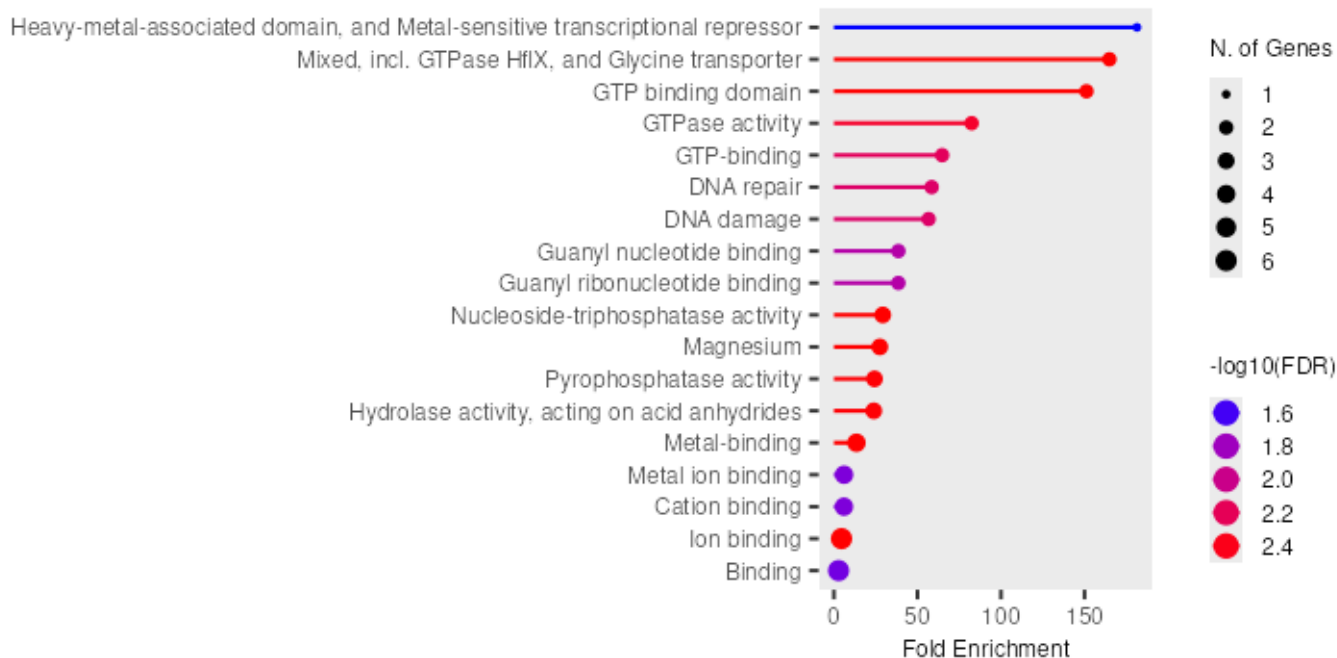

## B) UP

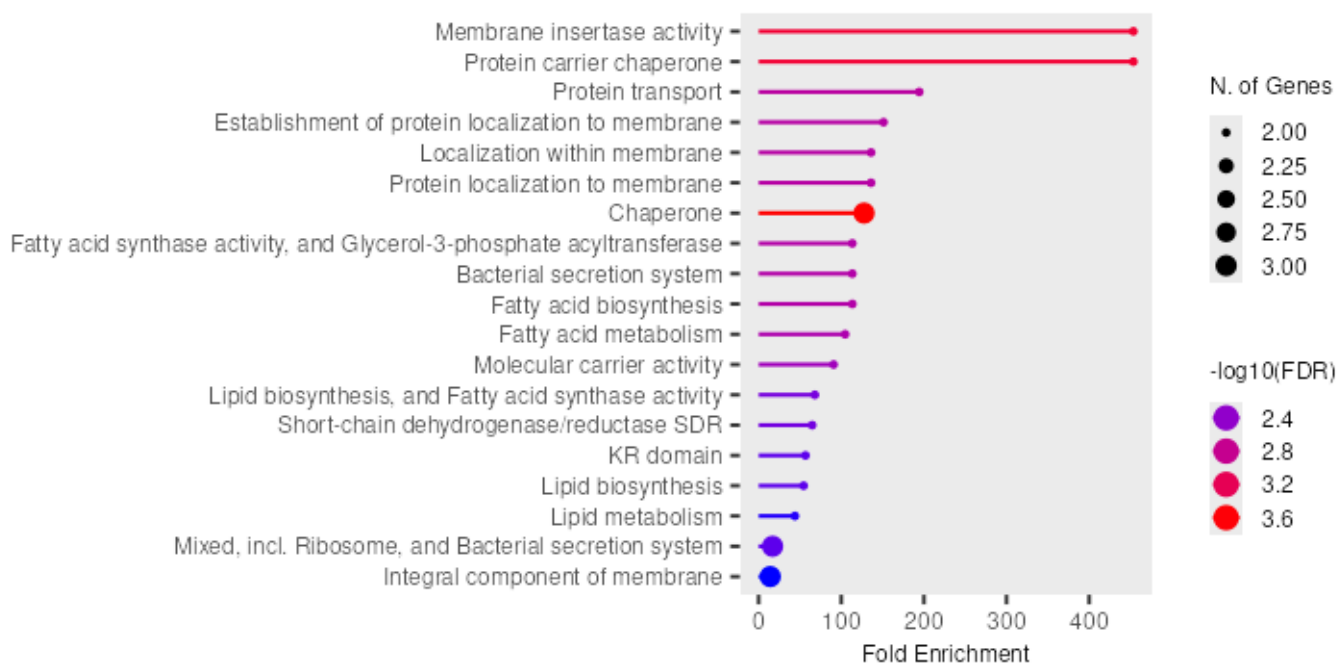

**S9:** ShinyGO gene ontology and enrichment for *Bacillus mycooides*: a) decreased statistically significant different protein abundance data set (DOWN) derived pathways, b) statistically significant different increased protein abundance data set (UP) derived pathways

A)

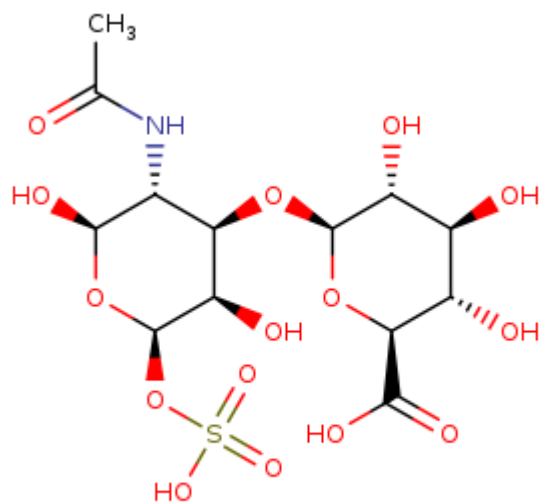

B)

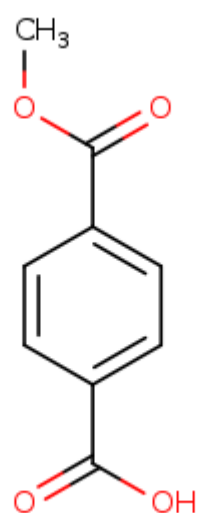

| Model | Calculated affinity (kcal/mol) |
|-------|--------------------------------|
| 1     | -5.020                         |
| 2     | -4.982                         |
| 3     | -4.908                         |
| 4     | -4.749                         |
| 5     | -4.632                         |
| 6     | -4.629                         |
| 7     | -4.505                         |
| 8     | -4.493                         |
| 9     | -4.392                         |
| 10    | -4.379                         |
| 11    | -4.304                         |
| 12    | -4.291                         |
| 13    | -4.266                         |
| 14    | -4.239                         |
| 15    | -4.235                         |
| 16    | -4.195                         |
| 17    | -4.115                         |
| 18    | -4.111                         |
| 19    | -4.073                         |
| 20    | -4.067                         |

| Model | Calculated affinity (kcal/mol) |
|-------|--------------------------------|
| 1     | -4.419                         |
| 2     | -4.400                         |
| 3     | -4.394                         |
| 4     | -4.291                         |
| 5     | -4.289                         |
| 6     | -4.271                         |
| 7     | -4.257                         |
| 8     | -4.257                         |
| 9     | -4.230                         |
| 10    | -4.216                         |
| 11    | -4.204                         |
| 12    | -4.203                         |
| 13    | -4.200                         |
| 14    | -4.183                         |
| 15    | -4.113                         |
| 16    | -4.097                         |
| 17    | -4.015                         |
| 18    | -3.960                         |
| 19    | -3.945                         |
| 20    | -3.932                         |

**S10:** AutoDock Vina binding affinities for chondroitin AC-lyase: A) Native chondroitin-sulfate monomer substrate binding affinity energy. B) MHET (monohydroxy-ethylene-terephthalate) substrate binding affinity energy.
